# Supplementary material for: The Association of Post-Materialism with Health Care Use. Findings of a General Population Survey in Germany
Source: MDPI journal article supplement (doi:10.3390/ijerph17238869), 2020-11-28
Supplement: s1 [file s1]

**Table S1.** Sample characteristics for the individuals included in negative binomial regressions stratified by sex and materialism/post-materialism status ( $n = 3338$ ).

| Variables                                                      | Men         |                          |                               |                  |                         | Women       |                          |                               |                  |            |
|----------------------------------------------------------------|-------------|--------------------------|-------------------------------|------------------|-------------------------|-------------|--------------------------|-------------------------------|------------------|------------|
|                                                                | Materialist | Materialistic Mixed Type | Post-Materialistic Mixed Type | Post-Materialist | $P$ -value <sup>2</sup> | Materialist | Materialistic Mixed Type | Post-Materialistic Mixed Type | Post-Materialist | $P$ -value |
|                                                                | $N = 149$   | $N = 513$                | $N = 574$                     | $N = 475$        |                         | $N = 202$   | $N = 441$                | $N = 514$                     | $N = 470$        |            |
| Age: Mean (SD)                                                 | 52.0 (19.4) | 51.5 (18.5)              | 50.0 (17.0)                   | 46.9 (16.0)      | 0.03                    | 53.5 (20.1) | 50.5 (17.7)              | 50.0 (16.5)                   | 46.6 (16.0)      | 0.03       |
| Marital status: N (%)                                          |             |                          |                               |                  | <0.01                   |             |                          |                               |                  | 0.41       |
| Married, living together with spouse/partner                   | 84 (56.4%)  | 305 (59.5%)              | 348 (60.6%)                   | 254 (53.5%)      |                         | 104 (51.5%) | 251 (56.9%)              | 292 (56.8%)                   | 232 (49.4%)      |            |
| Other <sup>1</sup>                                             | 65 (43.6%)  | 208 (40.5%)              | 226 (39.4%)                   | 221 (46.5%)      |                         | 98 (48.5%)  | 190 (43.1%)              | 222 (43.2%)                   | 238 (50.6%)      |            |
| Education (ISCED-97): N (%)                                    |             |                          |                               |                  | 0.39                    |             |                          |                               |                  | 0.03       |
| - Basic education                                              | 5 (3.4%)    | 6 (1.2%)                 | 4 (0.7%)                      | 2 (0.4%)         |                         | 7 (3.5%)    | 5 (1.1%)                 | 8 (1.6%)                      | 4 (0.9%)         |            |
| - Lower secondary                                              | 22 (14.8%)  | 41 (8.0%)                | 30 (5.2%)                     | 19 (4.0%)        |                         | 47 (23.3%)  | 56 (12.7%)               | 52 (10.1%)                    | 24 (5.1%)        |            |
| - Upper secondary                                              | 76 (51.0%)  | 262 (51.1%)              | 275 (47.9%)                   | 197 (41.5%)      |                         | 107 (53.0%) | 216 (49.0%)              | 247 (48.1%)                   | 192 (40.9%)      |            |
| - Post secondary                                               | 5 (3.4%)    | 24 (4.7%)                | 29 (5.1%)                     | 33 (6.9%)        |                         | 11 (5.4%)   | 35 (7.9%)                | 47 (9.1%)                     | 50 (10.6%)       |            |
| - Higher tertiary                                              | 36 (24.2%)  | 168 (32.7%)              | 225 (39.2%)                   | 209 (44.0%)      |                         | 29 (14.4%)  | 125 (28.3%)              | 154 (30.0%)                   | 190 (40.4%)      |            |
| - Upper tertiary                                               | 5 (3.4%)    | 12 (2.3%)                | 11 (1.9%)                     | 15 (3.2%)        |                         | 1 (0.5%)    | 4 (0.9%)                 | 6 (1.2%)                      | 10 (2.1%)        |            |
| Weight category: N (%)                                         |             |                          |                               |                  | 0.13                    |             |                          |                               |                  | 0.37       |
| - Underweight                                                  | 2 (1.3%)    | 5 (1.0%)                 | 3 (0.5%)                      | 3 (0.6%)         |                         | 7 (3.5%)    | 9 (2.0%)                 | 17 (3.3%)                     | 18 (3.8%)        |            |
| - Normal weight                                                | 56 (37.6%)  | 189 (36.8%)              | 202 (35.2%)                   | 192 (40.4%)      |                         | 85 (42.1%)  | 217 (49.2%)              | 260 (50.6%)                   | 255 (54.3%)      |            |
| - Overweight                                                   | 60 (40.3%)  | 217 (42.3%)              | 249 (43.4%)                   | 198 (41.7%)      |                         | 63 (31.2%)  | 132 (29.9%)              | 156 (30.4%)                   | 136 (28.9%)      |            |
| - Obese                                                        | 31 (20.8%)  | 102 (19.9%)              | 120 (20.9%)                   | 82 (17.3%)       |                         | 47 (23.3%)  | 83 (18.8%)               | 81 (15.8%)                    | 61 (13.0%)       |            |
| Currently smoking: N (%)                                       |             |                          |                               |                  | 0.52                    |             |                          |                               |                  | 0.28       |
| Yes                                                            | 58 (38.9%)  | 169 (32.9%)              | 192 (33.4%)                   | 149 (31.4%)      |                         | 45 (22.3%)  | 97 (22.0%)               | 130 (25.3%)                   | 121 (25.7%)      |            |
| No                                                             | 91 (61.1%)  | 344 (67.1%)              | 382 (66.6%)                   | 326 (68.6%)      |                         | 157 (77.7%) | 344 (78.0%)              | 384 (74.7%)                   | 349 (74.3%)      |            |
| Number of chronic diseases: Mean (SD)                          | 1.1 (1.2)   | 1.2 (1.4)                | 1.1 (1.2)                     | 1.0 (1.1)        | 0.35                    | 1.7 (1.7)   | 1.4 (1.4)                | 1.4 (1.5)                     | 1.1 (1.2)        | 0.02       |
| Activities of daily living (climbing stairs): N (%)            |             |                          |                               |                  | 0.16                    |             |                          |                               |                  | <0.01      |
| Not at all affected                                            | 89 (59.7%)  | 343 (66.9%)              | 369 (64.3%)                   | 359 (75.6%)      |                         | 96 (47.5%)  | 260 (59.0%)              | 311 (60.5%)                   | 323 (68.7%)      |            |
| Slightly affected                                              | 41 (27.5%)  | 118 (23.0%)              | 137 (23.9%)                   | 85 (17.9%)       |                         | 59 (29.2%)  | 122 (27.7%)              | 147 (28.6%)                   | 106 (22.6%)      |            |
| Greatly affected                                               | 19 (12.8%)  | 52 (10.1%)               | 68 (11.8%)                    | 31 (6.5%)        |                         | 47 (23.3%)  | 59 (13.4%)               | 56 (10.9%)                    | 41 (8.7%)        |            |
| Activities of daily living (coping with everyday tasks): N (%) |             |                          |                               |                  | 0.09                    |             |                          |                               |                  | <0.001     |
| Not at all affected                                            | 82 (55.0%)  | 291 (56.7%)              | 324 (56.4%)                   | 312 (65.7%)      |                         | 88 (43.6%)  | 216 (49.0%)              | 271 (52.7%)                   | 297 (63.2%)      |            |

|                                                                                                        |            |             |             |             |      |             |             |             |             |      |
|--------------------------------------------------------------------------------------------------------|------------|-------------|-------------|-------------|------|-------------|-------------|-------------|-------------|------|
| Slightly affected                                                                                      | 41 (27.5%) | 149 (29.0%) | 168 (29.3%) | 117 (24.6%) |      | 60 (29.7%)  | 144 (32.7%) | 159 (30.9%) | 126 (26.8%) |      |
| Greatly affected                                                                                       | 26 (17.4%) | 73 (14.2%)  | 82 (14.3%)  | 46 (9.7%)   |      | 54 (26.7%)  | 81 (18.4%)  | 84 (16.3%)  | 47 (10.0%)  |      |
| Number of doctor visits: Mean (SD)                                                                     | 1.7 (3.0)  | 1.9 (2.7)   | 1.8 (3.1)   | 1.6 (2.2)   | 0.32 | 3.0 (3.9)   | 2.6 (4.7)   | 2.3 (3.4)   | 1.9 (3.2)   | 0.17 |
| Reason for doctor visit: Acute illness: <i>N</i> (%)                                                   |            |             |             |             | 0.26 |             |             |             |             | 0.45 |
| No                                                                                                     | 75 (77.3%) | 247 (69.0%) | 277 (70.1%) | 220 (69.6%) |      | 118 (72.4%) | 232 (69.5%) | 267 (70.1%) | 215 (64.6%) |      |
| Yes                                                                                                    | 22 (22.7%) | 111 (31.0%) | 118 (29.9%) | 96 (30.4%)  |      | 45 (27.6%)  | 102 (30.5%) | 114 (29.9%) | 118 (35.4%) |      |
| Reason for doctor visit: Chronic illness: <i>N</i> (%)                                                 |            |             |             |             | 0.03 |             |             |             |             | 0.01 |
| No                                                                                                     | 69 (71.1%) | 246 (68.7%) | 282 (71.4%) | 241 (76.3%) |      | 82 (50.3%)  | 220 (65.9%) | 274 (71.9%) | 255 (76.6%) |      |
| Yes                                                                                                    | 28 (28.9%) | 112 (31.3%) | 113 (28.6%) | 75 (23.7%)  |      | 81 (49.7%)  | 114 (34.1%) | 107 (28.1%) | 78 (23.4%)  |      |
| Reason for doctor visit: Felt unwell: <i>N</i> (%)                                                     |            |             |             |             | 0.05 |             |             |             |             | 0.12 |
| No                                                                                                     | 90 (92.8%) | 335 (93.6%) | 373 (94.4%) | 292 (92.4%) |      | 143 (87.7%) | 300 (89.8%) | 345 (90.6%) | 308 (92.5%) |      |
| Yes                                                                                                    | 7 (7.2%)   | 23 (6.4%)   | 22 (5.6%)   | 24 (7.6%)   |      | 20 (12.3%)  | 34 (10.2%)  | 36 (9.4%)   | 25 (7.5%)   |      |
| Reason for doctor visit: Requesting advice: <i>N</i> (%)                                               |            |             |             |             | 0.08 |             |             |             |             | 0.16 |
| No                                                                                                     | 80 (82.5%) | 318 (88.8%) | 345 (87.3%) | 272 (86.1%) |      | 143 (87.7%) | 290 (86.8%) | 341 (89.5%) | 294 (88.3%) |      |
| Yes                                                                                                    | 17 (17.5%) | 40 (11.2%)  | 50 (12.7%)  | 44 (13.9%)  |      | 20 (12.3%)  | 44 (13.2%)  | 40 (10.5%)  | 39 (11.7%)  |      |
| Reason for doctor visit: visit to the doctor's office, but without consulting the doctor: <i>N</i> (%) |            |             |             |             | 0.32 |             |             |             |             | 0.71 |
| No                                                                                                     | 73 (75.3%) | 290 (81.0%) | 332 (84.1%) | 266 (84.2%) |      | 131 (80.4%) | 263 (78.7%) | 296 (77.7%) | 271 (81.4%) |      |
| Yes                                                                                                    | 24 (24.7%) | 68 (19.0%)  | 63 (15.9%)  | 50 (15.8%)  |      | 32 (19.6%)  | 71 (21.3%)  | 85 (22.3%)  | 62 (18.6%)  |      |
| Reason for doctor visit: preventive medical check-up/vaccination: <i>N</i> (%)                         |            |             |             |             | 0.85 |             |             |             |             | 0.13 |
| No                                                                                                     | 71 (73.2%) | 260 (72.6%) | 295 (74.7%) | 226 (71.5%) |      | 132 (81.0%) | 227 (68.0%) | 235 (61.7%) | 220 (66.1%) |      |
| Yes                                                                                                    | 26 (26.8%) | 98 (27.4%)  | 100 (25.3%) | 90 (28.5%)  |      | 31 (19.0%)  | 107 (32.0%) | 146 (38.3%) | 113 (33.9%) |      |

<sup>1</sup>: married and living apart; widowed; divorced; never married; civil partnership, living apart; registered partner deceased; civil partnership dissolved; <sup>2</sup>: Comparison based on oneway ANOVA or Chi-square test, as appropriate.

**Table S2.** Determinants of frequency of physician visits (total sample and stratified by sex). Results of Poisson regressions.

|                                                            | (1)                                           | (2)                                   | (3)                                     |
|------------------------------------------------------------|-----------------------------------------------|---------------------------------------|-----------------------------------------|
|                                                            | Frequency of Physician Visits–Total<br>Sample | Frequency of Physician Visits–<br>Men | Frequency of Physician Visits–<br>Women |
| Materialistic mixed type (Reference category: Materialist) | 1.00<br>(0.83–1.19)                           | 1.12<br>(0.84–1.48)                   | 0.95<br>(0.75–1.21)                     |
| Post-materialistic mixed type                              | 0.91<br>(0.76–1.08)                           | 1.10<br>(0.83–1.47)                   | 0.85<br>(0.68–1.07)                     |
| Post-materialist                                           | 0.87<br>(0.72–1.04)                           | 1.07<br>(0.81–1.42)                   | 0.78*<br>(0.61–0.99)                    |
| Covariates                                                 | ✓                                             | ✓                                     | ✓                                       |
| Constant                                                   | 1.23<br>(0.93–1.63)                           | 0.75<br>(0.52–1.07)                   | 1.88**<br>(1.24–2.84)                   |
| Observations                                               | 3338                                          | 1711                                  | 1627                                    |
| Pseudo R <sup>2</sup>                                      | 0.120                                         | 0.115                                 | 0.140                                   |
| AIC                                                        | 14,747.48                                     | 6778.58                               | 7754.31                                 |
| BIC                                                        | 14,869.75                                     | 6887.47                               | 7862.20                                 |
| k                                                          | 26                                            | 26                                    | 26                                      |
| df                                                         | 20                                            | 20                                    | 20                                      |

Incidence rate ratios were reported; confidence intervals in parentheses; \*\*\* p<0.001, \*\* p<0.01, \* p<0.05, + p<0.10; Covariates include age, marital status, education, chronic conditions, number of impairments in activities of daily living, smoking behavior, and weight category.

**Table S3.** Determinants of frequency of physician visits (total sample and stratified by sex). Results of negative binomial regressions (also displaying the coefficients for the covariates)

|                                                                                        | (1)                                           | (2)                                   | (3)                                     |
|----------------------------------------------------------------------------------------|-----------------------------------------------|---------------------------------------|-----------------------------------------|
|                                                                                        | Frequency of Physician Visits–Total<br>Sample | Frequency of Physician Visits–<br>Men | Frequency of Physician Visits–<br>Women |
| Materialistic mixed type (Reference category: Materialist)                             | 0.95<br>(0.81–1.13)                           | 1.18<br>(0.93–1.50)                   | 0.87<br>(0.70–1.09)                     |
| Post-materialistic mixed type                                                          | 0.89<br>(0.75–1.05)                           | 1.14<br>(0.90–1.45)                   | 0.80*<br>(0.65–0.99)                    |
| Post-materialist                                                                       | 0.83*<br>(0.70–0.99)                          | 1.10<br>(0.87–1.39)                   | 0.72**<br>(0.57–0.89)                   |
| Covariates:                                                                            |                                               |                                       |                                         |
| Age                                                                                    | 1.00+<br>(0.99–1.00)                          | 1.00+<br>(1.00–1.01)                  | 0.99***<br>(0.99–1.00)                  |
| Marital status:                                                                        |                                               |                                       |                                         |
| Married, living together with spouse/partner (Reference category: Other <sup>1</sup> ) | 0.97<br>(0.87–1.07)                           | 0.83*<br>(0.71–0.97)                  | 1.03<br>(0.91–1.18)                     |
| Education (ISCED-97):                                                                  |                                               |                                       |                                         |
| - Basic education (Reference category: Upper secondary)                                | 1.06<br>(0.71–1.58)                           | 1.59<br>(0.78–3.25)                   | 0.72+<br>(0.50–1.02)                    |
| - Lower secondary                                                                      | 0.89<br>(0.76–1.03)                           | 0.92<br>(0.70–1.19)                   | 0.88<br>(0.73–1.06)                     |
| - Post secondary                                                                       | 1.06<br>(0.88–1.26)                           | 1.11<br>(0.85–1.45)                   | 0.98<br>(0.78–1.25)                     |
| - Higher tertiary                                                                      | 1.23***<br>(1.09–1.38)                        | 1.13<br>(0.97–1.31)                   | 1.29***<br>(1.11–1.51)                  |
| - Upper tertiary                                                                       | 0.79+<br>(0.60–1.03)                          | 0.89<br>(0.66–1.21)                   | 0.55*<br>(0.31–0.95)                    |
| Currently not smoking (Reference category: currently smoking)                          | 1.17**<br>(1.04–1.31)                         | 1.11<br>(0.94–1.30)                   | 1.15+<br>(0.98–1.34)                    |
| Weight category:                                                                       |                                               |                                       |                                         |

|                                                               |                        |                        |                        |
|---------------------------------------------------------------|------------------------|------------------------|------------------------|
| - Underweight (Reference category: normal weight)             | 1.04<br>(0.69–1.56)    | 0.51*<br>(0.30–0.86)   | 1.07<br>(0.69–1.64)    |
| - Overweight                                                  | 0.90*<br>(0.81–0.99)   | 0.93<br>(0.81–1.08)    | 0.90<br>(0.78–1.05)    |
| - Obesity                                                     | 0.99<br>(0.86–1.13)    | 0.97<br>(0.81–1.17)    | 1.04<br>(0.86–1.26)    |
| Number of chronic diseases                                    | 1.20***<br>(1.15–1.26) | 1.29***<br>(1.19–1.39) | 1.13***<br>(1.08–1.18) |
| Activities of daily living (climbing stairs):                 |                        |                        |                        |
| - Slightly affected (Reference category: Not at all affected) | 1.34***<br>(1.18–1.53) | 1.34**<br>(1.11–1.62)  | 1.30**<br>(1.09–1.54)  |
| - Greatly affected                                            | 1.73***<br>(1.43–2.10) | 1.37*<br>(1.04–1.81)   | 1.96***<br>(1.54–2.50) |
| Activities of daily living (coping with everyday tasks)       | 1.25***<br>(1.10–1.42) | 1.21*<br>(1.01–1.46)   | 1.30**<br>(1.10–1.53)  |
| - Slightly affected (Reference category: Not at all affected) | 1.55***<br>(1.30–1.84) | 1.41**<br>(1.11–1.79)  | 1.75***<br>(1.38–2.21) |
| - Greatly affected                                            |                        |                        |                        |
| Constant                                                      | 1.23<br>(0.93–1.63)    | 0.75<br>(0.52–1.07)    | 1.88**<br>(1.24–2.84)  |
| Observations                                                  | 3338                   | 1711                   | 1627                   |
| Pseudo R <sup>2</sup>                                         | 0.120                  | 0.115                  | 0.140                  |

<sup>1</sup>: married and living apart; widowed; divorced; never married; civil partnership, living apart; registered partner deceased; civil partnership dissolved. Incidence rate ratios were reported; confidence intervals in parentheses; \*\*\* p<0.001, \*\* p<0.01, \* p<0.05, + p<0.10

**Table S4.** Determinants of seeing the doctor (for several reasons). Results of logistic regressions (1 = yes, visiting the doctor for this reason; 0 = otherwise) (also displaying the coefficients for the covariates).

|                                              |       |                                           |             | Reason for<br>Doctor<br>Visit:<br>Chronic<br>Illness–<br>Men | Reason for<br>Doctor<br>Visit: Felt<br>Unwell–<br>Men | Reason for<br>Doctor<br>Visit:<br>Requestin<br>g Advice–<br>Men | Reason for<br>Doctor<br>Visit: Visit<br>to the<br>Doctor’s<br>Office<br>(Without<br>Consulting<br>the<br>Doctor)–<br>Men | Reason for<br>Doctor<br>Visit:<br>Preventive<br>Medical<br>Check-<br>up/Vaccina<br>tion – Men | Reason for<br>Doctor<br>Visit:<br>Acute<br>Illness–<br>Women | Reason for<br>Doctor<br>Visit:<br>Chronic<br>Illness –<br>Women | Reason for<br>Doctor<br>Visit: Felt<br>Unwell–<br>Women | Reason for<br>Doctor<br>Visit:<br>Requestin<br>g Advice–<br>Women | Reason for<br>Doctor<br>Visit: Visit<br>to the<br>Doctor’s<br>Office<br>(Without<br>Consulting<br>the<br>Doctor)–<br>Women | Reason for<br>Doctor<br>Visit:<br>Preventive<br>Medical<br>Check-<br>up/Vaccina<br>tion–<br>Women |
|----------------------------------------------|-------|-------------------------------------------|-------------|--------------------------------------------------------------|-------------------------------------------------------|-----------------------------------------------------------------|--------------------------------------------------------------------------------------------------------------------------|-----------------------------------------------------------------------------------------------|--------------------------------------------------------------|-----------------------------------------------------------------|---------------------------------------------------------|-------------------------------------------------------------------|----------------------------------------------------------------------------------------------------------------------------|---------------------------------------------------------------------------------------------------|
| Materialistic                                | mixed | type                                      | 1.47        | 1.32                                                         | 0.86                                                  | 0.60                                                            | 0.73                                                                                                                     | 0.95                                                                                          | 1.14                                                         | 0.60*                                                           | 0.82                                                    | 1.17                                                              | 1.23                                                                                                                       | 1.79*                                                                                             |
| (Reference category: Materialist)            |       |                                           | (0.83–2.59) | (0.75–2.31)                                                  | (0.35–2.12)                                           | (0.32–1.14)                                                     | (0.42–1.29)                                                                                                              | (0.56–1.61)                                                                                   | (0.73–1.76)                                                  | (0.37–0.95)                                                     | (0.45–1.49)                                             | (0.66–2.09)                                                       | (0.76–1.99)                                                                                                                | (1.12–2.84)                                                                                       |
| Post-materialistic                           | mixed | type                                      | 1.30        | 1.22                                                         | 0.79                                                  | 0.70                                                            | 0.63                                                                                                                     | 0.80                                                                                          | 1.03                                                         | 0.44***                                                         | 0.76                                                    | 0.93                                                              | 1.35                                                                                                                       | 2.25***                                                                                           |
|                                              |       |                                           | (0.74–2.28) | (0.69–2.14)                                                  | (0.32–1.96)                                           | (0.37–1.30)                                                     | (0.36–1.11)                                                                                                              | (0.47–1.35)                                                                                   | (0.67–1.59)                                                  | (0.28–0.71)                                                     | (0.42–1.39)                                             | (0.52–1.68)                                                       | (0.84–2.18)                                                                                                                | (1.43–3.56)                                                                                       |
| Post-materialist                             |       |                                           | 1.13        | 1.24                                                         | 1.12                                                  | 0.82                                                            | 0.76                                                                                                                     | 0.93                                                                                          | 1.23                                                         | 0.48**                                                          | 0.60                                                    | 1.08                                                              | 1.19                                                                                                                       | 1.63*                                                                                             |
|                                              |       |                                           | (0.63–2.02) | (0.69–2.23)                                                  | (0.45–2.80)                                           | (0.43–1.56)                                                     | (0.42–1.38)                                                                                                              | (0.54–1.60)                                                                                   | (0.79–1.91)                                                  | (0.29–0.78)                                                     | (0.31–1.15)                                             | (0.59–1.97)                                                       | (0.72–1.97)                                                                                                                | (1.02–2.62)                                                                                       |
| Covariates:                                  |       |                                           |             |                                                              |                                                       |                                                                 |                                                                                                                          |                                                                                               |                                                              |                                                                 |                                                         |                                                                   |                                                                                                                            |                                                                                                   |
| Age                                          |       |                                           | 0.96***     | 1.03***                                                      | 0.99                                                  | 1.01+                                                           | 1.01*                                                                                                                    | 1.01*                                                                                         | 0.97***                                                      | 1.02***                                                         | 0.99+                                                   | 1.00                                                              | 1.00                                                                                                                       | 1.01                                                                                              |
|                                              |       |                                           | (0.95–0.97) | (1.02–1.04)                                                  | (0.97–1.00)                                           | (1.00–1.02)                                                     | (1.00–1.03)                                                                                                              | (1.00–1.02)                                                                                   | (0.96–0.98)                                                  | (1.01–1.04)                                                     | (0.97–1.00)                                             | (0.99–1.01)                                                       | (0.99–1.01)                                                                                                                | (1.00–1.01)                                                                                       |
| Marital status:                              |       |                                           |             |                                                              |                                                       |                                                                 |                                                                                                                          |                                                                                               |                                                              |                                                                 |                                                         |                                                                   |                                                                                                                            |                                                                                                   |
| Married, living together with spouse/partner |       | (Reference category: Other <sup>1</sup> ) | 1.19        | 0.79                                                         | 1.10                                                  | 1.06                                                            | 1.12                                                                                                                     | 1.21                                                                                          | 0.82                                                         | 0.94                                                            | 0.82                                                    | 0.99                                                              | 1.00                                                                                                                       | 0.98                                                                                              |
|                                              |       |                                           | (0.87–1.63) | (0.57–1.09)                                                  | (0.63–1.92)                                           | (0.71–1.58)                                                     | (0.78–1.62)                                                                                                              | (0.89–1.64)                                                                                   | (0.63–1.06)                                                  | (0.69–1.27)                                                     | (0.55–1.23)                                             | (0.69–1.42)                                                       | (0.74–1.34)                                                                                                                | (0.76–1.27)                                                                                       |
| Education (ISCED-97):                        |       |                                           |             |                                                              |                                                       |                                                                 |                                                                                                                          |                                                                                               |                                                              |                                                                 |                                                         |                                                                   |                                                                                                                            |                                                                                                   |
| - Basic education                            |       | (Reference category: Upper secondary)     | 1.10        | 1.89                                                         | 3.34                                                  |                                                                 | 1.14                                                                                                                     | 2.31                                                                                          | 1.00                                                         | 2.53                                                            | 1.06                                                    | 1.68                                                              | 0.22                                                                                                                       | 0.79                                                                                              |
|                                              |       |                                           | (0.29–4.15) | (0.48–7.35)                                                  | (0.63–17.73)                                          |                                                                 | (0.22–5.84)                                                                                                              | (0.62–8.54)                                                                                   | (0.33–3.07)                                                  | (0.75–8.47)                                                     | (0.22–4.99)                                             | (0.45–6.27)                                                       | (0.03–1.74)                                                                                                                | (0.22–2.89)                                                                                       |
| - Lower secondary                            |       |                                           | 1.05        | 0.78                                                         | 1.37                                                  | 1.64                                                            | 1.11                                                                                                                     | 0.53                                                                                          | 1.07                                                         | 1.15                                                            | 1.08                                                    | 1.08                                                              | 0.79                                                                                                                       | 0.79                                                                                              |
|                                              |       |                                           | (0.58–1.90) | (0.39–1.59)                                                  | (0.53–3.52)                                           | (0.80–3.35)                                                     | (0.55–2.26)                                                                                                              | (0.24–1.16)                                                                                   | (0.69–1.66)                                                  | (0.71–1.86)                                                     | (0.58–2.02)                                             | (0.61–1.90)                                                       | (0.49–1.28)                                                                                                                | (0.50–1.24)                                                                                       |
| - Post secondary                             |       |                                           | 1.31        | 0.93                                                         | 1.28                                                  | 0.44                                                            | 0.44                                                                                                                     | 2.01*                                                                                         | 1.25                                                         | 1.16                                                            | 1.30                                                    | 1.00                                                              | 0.97                                                                                                                       | 1.21                                                                                              |
|                                              |       |                                           | (0.72–2.38) | (0.44–1.96)                                                  | (0.43–3.84)                                           | (0.13–1.48)                                                     | (0.15–1.28)                                                                                                              | (1.11–3.65)                                                                                   | (0.78–2.02)                                                  | (0.61–2.22)                                                     | (0.62–2.74)                                             | (0.50–2.00)                                                       | (0.55–1.72)                                                                                                                | (0.75–1.94)                                                                                       |
| - Higher tertiary                            |       |                                           | 1.15        | 0.85                                                         | 1.13                                                  | 1.35                                                            | 0.81                                                                                                                     | 1.56**                                                                                        | 1.09                                                         | 1.16                                                            | 1.14                                                    | 0.85                                                              | 0.76                                                                                                                       | 1.33*                                                                                             |

|                                                               |              |             |              |              |             |             |              |             |              |             |             |             |
|---------------------------------------------------------------|--------------|-------------|--------------|--------------|-------------|-------------|--------------|-------------|--------------|-------------|-------------|-------------|
|                                                               | (0.85–1.57)  | (0.62–1.18) | (0.65–1.95)  | (0.91–2.01)  | (0.57–1.16) | (1.16–2.09) | (0.81–1.48)  | (0.82–1.65) | (0.72–1.83)  | (0.55–1.29) | (0.54–1.06) | (1.00–1.77) |
| - Upper tertiary                                              | 1.50         | 0.77        | 2.02         | 1.12         | 0.91        | 1.13        | 0.69         | 0.41        | 1.40         | 0.82        | 0.45        | 1.93        |
|                                                               | (0.59–3.78)  | (0.30–1.96) | (0.55–7.42)  | (0.39–3.19)  | (0.34–2.45) | (0.48–2.68) | (0.14–3.37)  | (0.04–3.68) | (0.17–11.54) | (0.10–6.63) | (0.06–3.66) | (0.54–6.92) |
| Currently not smoking (Reference category: currently smoking) | 0.90         | 0.99        | 1.37         | 0.93         | 1.12        | 0.99        | 0.87         | 0.93        | 0.90         | 1.34        | 1.35        | 1.23        |
|                                                               | (0.67–1.22)  | (0.70–1.40) | (0.77–2.42)  | (0.62–1.41)  | (0.76–1.65) | (0.73–1.35) | (0.65–1.18)  | (0.64–1.36) | (0.56–1.43)  | (0.84–2.15) | (0.92–1.97) | (0.90–1.69) |
| Weight category:                                              |              |             |              |              |             |             |              |             |              |             |             |             |
| - Underweight (Reference category: normal weight)             | 0.68         | 0.76        | 1.17         | 2.85         |             |             | 2.12*        | 1.29        | 0.76         | 0.21        | 0.92        | 0.79        |
|                                                               | (0.11–4.40)  | (0.09–6.18) | (0.11–12.60) | (0.47–17.33) |             |             | (1.03–4.36)  | (0.46–3.65) | (0.22–2.64)  | (0.03–1.54) | (0.36–2.36) | (0.37–1.73) |
| - Overweight                                                  | 1.23         | 0.97        | 0.88         | 0.56**       | 1.10        | 1.09        | 1.11         | 1.21        | 0.88         | 1.03        | 1.15        | 0.92        |
|                                                               | (0.90–1.68)  | (0.69–1.37) | (0.51–1.54)  | (0.37–0.85)  | (0.75–1.62) | (0.80–1.47) | (0.82–1.50)  | (0.85–1.71) | (0.54–1.41)  | (0.68–1.55) | (0.82–1.62) | (0.68–1.23) |
| - Obesity                                                     | 0.89         | 1.48+       | 0.87         | 0.81         | 1.23        | 0.77        | 0.82         | 1.30        | 1.08         | 0.85        | 1.21        | 0.92        |
|                                                               | (0.60–1.32)  | (0.99–2.21) | (0.44–1.70)  | (0.50–1.31)  | (0.79–1.93) | (0.52–1.14) | (0.56–1.20)  | (0.87–1.95) | (0.63–1.84)  | (0.51–1.43) | (0.81–1.81) | (0.63–1.33) |
| Number of chronic diseases                                    | 0.94         | 1.61***     | 1.14         | 0.94         | 1.37***     | 0.95        | 1.09         | 1.77***     | 1.12         | 1.00        | 1.28***     | 0.89*       |
|                                                               | (0.83–1.07)  | (1.41–1.83) | (0.94–1.39)  | (0.80–1.10)  | (1.20–1.56) | (0.84–1.07) | (0.98–1.20)  | (1.57–1.99) | (0.97–1.30)  | (0.87–1.15) | (1.15–1.43) | (0.80–0.99) |
| Activities of daily living (climbing stairs):                 |              |             |              |              |             |             |              |             |              |             |             |             |
| - Slightly affected (Reference category: Not at all affected) | 0.93         | 1.42+       | 1.09         | 0.96         | 1.38        | 1.05        | 1.08         | 1.54*       | 0.88         | 0.90        | 1.22        | 0.85        |
|                                                               | (0.63–1.38)  | (0.96–2.09) | (0.57–2.09)  | (0.58–1.58)  | (0.89–2.13) | (0.72–1.53) | (0.76–1.53)  | (1.04–2.27) | (0.52–1.51)  | (0.54–1.49) | (0.83–1.82) | (0.60–1.19) |
| - Greatly affected                                            | 0.99         | 2.02*       | 0.82         | 2.18+        | 1.28        | 1.04        | 0.90         | 1.50        | 0.76         | 1.69        | 1.27        | 0.97        |
|                                                               | (0.52–1.89)  | (1.13–3.61) | (0.31–2.16)  | (1.00–4.78)  | (0.67–2.45) | (0.56–1.93) | (0.52–1.57)  | (0.85–2.65) | (0.35–1.66)  | (0.81–3.51) | (0.71–2.27) | (0.55–1.69) |
| Activities of daily living (coping with everyday tasks)       |              |             |              |              |             |             |              |             |              |             |             |             |
| - Slightly affected (Reference category: Not at all affected) | 1.05         | 1.10        | 2.11*        | 1.22         | 1.16        | 0.91        | 1.11         | 1.13        | 1.63+        | 1.10        | 1.00        | 0.75+       |
|                                                               | (0.74–1.49)  | (0.75–1.61) | (1.11–3.99)  | (0.77–1.92)  | (0.76–1.78) | (0.64–1.29) | (0.79–1.56)  | (0.76–1.68) | (0.96–2.75)  | (0.68–1.78) | (0.68–1.48) | (0.54–1.04) |
| - Greatly affected                                            | 0.81         | 1.15        | 3.30**       | 0.50+        | 0.99        | 0.66        | 1.44         | 1.88*       | 2.15*        | 0.89        | 0.75        | 0.61+       |
|                                                               | (0.46–1.43)  | (0.67–1.96) | (1.41–7.71)  | (0.23–1.09)  | (0.54–1.80) | (0.38–1.16) | (0.86–2.41)  | (1.09–3.24) | (1.03–4.49)  | (0.43–1.84) | (0.42–1.31) | (0.36–1.02) |
| Constant                                                      | 3.60*        | 0.02***     | 0.03***      | 0.09***      | 0.07***     | 0.16**      | 4.49**       | 0.04***     | 0.25+        | 0.08***     | 0.05***     | 0.21**      |
|                                                               | (1.18–10.96) | (0.01–0.07) | (0.00–0.20)  | (0.02–0.35)  | (0.02–0.26) | (0.05–0.47) | (1.68–12.03) | (0.01–0.12) | (0.06–1.08)  | (0.02–0.31) | (0.02–0.15) | (0.08–0.57) |
| Observations                                                  | 1170         | 1170        | 1170         | 1159         | 1163        | 1163        | 1213         | 1213        | 1213         | 1213        | 1213        | 1213        |
| Pseudo R <sup>2</sup>                                         | 0.095        | 0.179       | 0.040        | 0.034        | 0.086       | 0.033       | 0.061        | 0.268       | 0.025        | 0.015       | 0.043       | 0.041       |

<sup>1</sup>: married and living apart; widowed; divorced; never married; civil partnership, living apart; registered partner deceased; civil partnership dissolved. Odds ratios were reported; confidence intervals in parentheses; \*\*\* p<0.001, \*\* p<0.01, \* p<0.05, + p<0.10.

**Table S5.** Determinants of frequency of physician visits (total sample and stratified by sex). Results of negative binomial regressions (with ‘Post-materialist’ as reference category).

|                                                    | (1)                                        | (2)                               | (3)                                 |
|----------------------------------------------------|--------------------------------------------|-----------------------------------|-------------------------------------|
|                                                    | Frequency of Physician Visits–Total Sample | Frequency of Physician Visits–Men | Frequency of Physician Visits–Women |
| Materialist (Reference category: Post-materialist) | 1.20*<br>(1.01–1.43)                       | 0.91<br>(0.72–1.15)               | 1.40**<br>(1.12–1.75)               |
| Materialistic mixed type                           | 1.15*<br>(1.02–1.30)                       | 1.08<br>(0.92–1.26)               | 1.22*<br>(1.03–1.45)                |
| Post-materialistic mixed type                      | 1.07<br>(0.95–1.20)                        | 1.04<br>(0.88–1.22)               | 1.12<br>(0.95–1.31)                 |
| Covariates                                         | ✓                                          | ✓                                 | ✓                                   |
| Constant                                           | 0.92<br>(0.74–1.13)                        | 0.72*<br>(0.54–0.95)              | 1.22<br>(0.90–1.65)                 |
| Observations                                       | 3338                                       | 1711                              | 1627                                |
| Pseudo R <sup>2</sup>                              | 0.053                                      | 0.058                             | 0.056                               |

Incidence rate ratios were reported; confidence intervals in parentheses; \*\*\* p<0.001, \*\* p<0.01, \* p<0.05, + p<0.10; Covariates include age, marital status, education, chronic conditions, number of impairments in activities of daily living, smoking behavior, and weight category.



**Table S6.** Determinants of seeing the doctor (for several reasons). Results of logistic regressions (1 = yes, visiting the doctor for this reason; 0 = otherwise) (with ‘Post-materialist’ as reference category).

|                                                       | Reason for<br>Doctor<br>Visit:<br>Acute<br>Illness–<br>Men | Reason for<br>Doctor<br>Visit:<br>Chronic<br>Illness–<br>Men | Reason for<br>Doctor<br>Visit: Felt<br>Unwell–<br>Men | Reason for<br>Doctor<br>Visit:<br>Requestin<br>g Advice–<br>Men | Reason for<br>Doctor<br>Visit: Visit<br>to the<br>Doctor’s<br>Office<br>(Without<br>Consulting<br>the<br>Doctor)–<br>Men | Reason for<br>Doctor<br>Visit:<br>Preventive<br>Medical<br>Check-<br>up/Vaccina<br>tion–Men | Reason for<br>Doctor<br>Visit:<br>Acute<br>Illness–<br>Women | Reason for<br>Doctor<br>Visit:<br>Chronic<br>Illness–<br>Women | Reason for<br>Doctor<br>Visit: Felt<br>Unwell–<br>Women | Reason for<br>Doctor<br>Visit:<br>Requestin<br>g Advice–<br>Women | Reason for<br>Doctor<br>Visit: Visit<br>to the<br>Doctor’s<br>Office<br>(Without<br>Consulting<br>the<br>Doctor)–<br>Women | Reason for<br>Doctor<br>Visit:<br>Preventive<br>Medical<br>Check-<br>up/Vaccina<br>tion–<br>Women |
|-------------------------------------------------------|------------------------------------------------------------|--------------------------------------------------------------|-------------------------------------------------------|-----------------------------------------------------------------|--------------------------------------------------------------------------------------------------------------------------|---------------------------------------------------------------------------------------------|--------------------------------------------------------------|----------------------------------------------------------------|---------------------------------------------------------|-------------------------------------------------------------------|----------------------------------------------------------------------------------------------------------------------------|---------------------------------------------------------------------------------------------------|
| Materialist (Reference category:<br>Post-materialist) | 0.87<br>(0.49–1.55)                                        | 0.82<br>(0.46–1.47)                                          | 0.91<br>(0.36–2.25)                                   | 1.25<br>(0.66–2.37)                                             | 1.30<br>(0.72–2.34)                                                                                                      | 1.09<br>(0.63–1.86)                                                                         | 0.81<br>(0.52–1.26)                                          | 2.08**<br>(1.27–3.41)                                          | 1.68<br>(0.87–3.23)                                     | 0.93<br>(0.51–1.71)                                               | 0.85<br>(0.51–1.41)                                                                                                        | 0.61*<br>(0.38–0.98)                                                                              |
| Materialistic mixed type                              | 1.30<br>(0.91–1.85)                                        | 1.07<br>(0.72–1.57)                                          | 0.77<br>(0.42–1.43)                                   | 0.74<br>(0.46–1.18)                                             | 0.96<br>(0.63–1.47)                                                                                                      | 1.03<br>(0.72–1.45)                                                                         | 0.92<br>(0.65–1.29)                                          | 1.25<br>(0.83–1.87)                                            | 1.37<br>(0.78–2.39)                                     | 1.09<br>(0.68–1.75)                                               | 1.04<br>(0.70–1.55)                                                                                                        | 1.09<br>(0.78–1.52)                                                                               |
| Post-materialistic mixed type                         | 1.14<br>(0.81–1.60)                                        | 0.99<br>(0.67–1.44)                                          | 0.71<br>(0.39–1.31)                                   | 0.86<br>(0.55–1.34)                                             | 0.82<br>(0.54–1.26)                                                                                                      | 0.86<br>(0.61–1.21)                                                                         | 0.84<br>(0.61–1.17)                                          | 0.92<br>(0.61–1.38)                                            | 1.28<br>(0.74–2.20)                                     | 0.87<br>(0.54–1.39)                                               | 1.14<br>(0.78–1.67)                                                                                                        | 1.37+<br>(1.00–1.88)                                                                              |
| Covariates                                            | ✓                                                          | ✓                                                            | ✓                                                     | ✓                                                               | ✓                                                                                                                        | ✓                                                                                           | ✓                                                            | ✓                                                              | ✓                                                       | ✓                                                                 | ✓                                                                                                                          | ✓                                                                                                 |
| Constant                                              | 3.16***<br>(1.69–5.91)                                     | 0.04***<br>(0.02–0.08)                                       | 0.05***<br>(0.01–0.15)                                | 0.12***<br>(0.05–0.28)                                          | 0.04***<br>(0.02–0.09)                                                                                                   | 0.18***<br>(0.10–0.36)                                                                      | 2.43**<br>(1.28–4.59)                                        | 0.03***<br>(0.01–0.06)                                         | 0.13***<br>(0.05–0.35)                                  | 0.08***<br>(0.03–0.22)                                            | 0.09***<br>(0.04–0.19)                                                                                                     | 0.35**<br>(0.18–0.67)                                                                             |
| Observations                                          | 1170                                                       | 1170                                                         | 1170                                                  | 1159                                                            | 1163                                                                                                                     | 1163                                                                                        | 1214                                                         | 1214                                                           | 1214                                                    | 1214                                                              | 1214                                                                                                                       | 1214                                                                                              |
| Pseudo R <sup>2</sup>                                 | 0.094                                                      | 0.179                                                        | 0.040                                                 | 0.033                                                           | 0.086                                                                                                                    | 0.033                                                                                       | 0.057                                                        | 0.267                                                          | 0.0250                                                  | 0.015                                                             | 0.042                                                                                                                      | 0.041                                                                                             |

Odds ratios were reported; confidence intervals in parentheses; \*\*\* p<0.001, \*\* p<0.01, \* p<0.05, + p<0.10; Covariates include age, marital status, education, chronic conditions, number of impairments in activities of daily living, smoking behavior, and weight category.

**Table S7.** Determinants of frequency of physician visits (total sample and stratified by sex). Results of negative binomial regressions (main model extended by (log) household net equivalent income).

|                                                            | (1)                                           | (2)                                   | (3)                                     |
|------------------------------------------------------------|-----------------------------------------------|---------------------------------------|-----------------------------------------|
|                                                            | Frequency of Physician Visits–Total<br>Sample | Frequency of Physician Visits–<br>Men | Frequency of Physician Visits–<br>Women |
| Materialistic mixed type (Reference category: Materialist) | 0.96<br>(0.81–1.13)                           | 1.18<br>(0.93–1.50)                   | 0.88<br>(0.70–1.09)                     |
| Post-materialistic mixed type                              | 0.89<br>(0.75–1.05)                           | 1.14<br>(0.89–1.44)                   | 0.80*<br>(0.65–0.99)                    |
| Post-materialist                                           | 0.83*<br>(0.70–0.99)                          | 1.10<br>(0.87–1.39)                   | 0.72**<br>(0.57–0.90)                   |
| Covariates                                                 | ✓                                             | ✓                                     | ✓                                       |
| Constant                                                   | 1.23<br>(0.86–1.76)                           | 0.74<br>(0.47–1.17)                   | 1.80*<br>(1.09–3.00)                    |
| Observations                                               | 3332                                          | 1708                                  | 1624                                    |
| Pseudo R <sup>2</sup>                                      | 0.053                                         | 0.058                                 | 0.055                                   |

Incidence rate ratios were reported; confidence intervals in parentheses; \*\*\* p<0.001, \*\* p<0.01, \* p<0.05, + p<0.10; Covariates include age, marital status, education, income, chronic conditions, number of impairments in activities of daily living, smoking behavior, and weight category.

**Table S8.** Determinants of seeing the doctor (for several reasons). Results of logistic regressions (1 = yes, visiting the doctor for this reason; 0 = otherwise). (main model extended by (log) household net equivalent income).

|                                                               | Reason for<br>Doctor<br>Visit:<br>Acute<br>Illness–<br>Men | Reason for<br>doctor<br>visit:<br>Chronic<br>illness –<br>Men | Reason for<br>doctor<br>visit: Felt<br>unwell–<br>Men | Reason for<br>doctor<br>visit:<br>Requestin<br>g advice–<br>Men | Reason for<br>doctor<br>visit: Visit<br>to the<br>doctor’s<br>office<br>(without<br>consulting<br>the<br>doctor)–<br>Men | Reason for<br>doctor<br>visit:<br>Preventive<br>medical<br>check-<br>up/vaccina<br>tion – Men | Reason for<br>Doctor<br>Visit:<br>Acute<br>Illness–<br>Women | Reason for<br>doctor<br>visit:<br>Chronic<br>illness –<br>Women | Reason for<br>Doctor<br>Visit: Felt<br>Unwell–<br>Women | Reason for<br>Doctor<br>Visit:<br>Requestin<br>g Advice–<br>Women | Reason for<br>Doctor<br>Visit: Visit<br>to the<br>Doctor’s<br>Office<br>(Without<br>Consulting<br>the<br>Doctor)–<br>Women | Reason for<br>Doctor<br>Visit:<br>Preventive<br>Medical<br>Check-<br>up/Vaccina<br>tion –<br>Women |
|---------------------------------------------------------------|------------------------------------------------------------|---------------------------------------------------------------|-------------------------------------------------------|-----------------------------------------------------------------|--------------------------------------------------------------------------------------------------------------------------|-----------------------------------------------------------------------------------------------|--------------------------------------------------------------|-----------------------------------------------------------------|---------------------------------------------------------|-------------------------------------------------------------------|----------------------------------------------------------------------------------------------------------------------------|----------------------------------------------------------------------------------------------------|
| Materialistic mixed type<br>(Reference category: Materialist) | 1.47<br>(0.83–2.59)                                        | 1.32<br>(0.75–2.31)                                           | 0.86<br>(0.35–2.12)                                   | 0.60<br>(0.32–1.14)                                             | 0.73<br>(0.42–1.29)                                                                                                      | 0.95<br>(0.56–1.61)                                                                           | 1.14<br>(0.73–1.76)                                          | 0.60*<br>(0.37–0.95)                                            | 0.82<br>(0.45–1.49)                                     | 1.17<br>(0.66–2.09)                                               | 1.23<br>(0.76–1.99)                                                                                                        | 1.79*<br>(1.12–2.84)                                                                               |
| Post-materialistic mixed type                                 | 1.30<br>(0.74–2.28)                                        | 1.22<br>(0.69–2.14)                                           | 0.79<br>(0.32–1.96)                                   | 0.70<br>(0.37–1.30)                                             | 0.63<br>(0.36–1.11)                                                                                                      | 0.80<br>(0.47–1.35)                                                                           | 1.03<br>(0.67–1.59)                                          | 0.44***<br>(0.28–0.71)                                          | 0.76<br>(0.42–1.39)                                     | 0.93<br>(0.52–1.68)                                               | 1.35<br>(0.84–2.18)                                                                                                        | 2.25***<br>(1.43–3.56)                                                                             |
| Post-materialist                                              | 1.13<br>(0.63–2.02)                                        | 1.24<br>(0.69–2.23)                                           | 1.12<br>(0.45–2.80)                                   | 0.82<br>(0.43–1.56)                                             | 0.76<br>(0.42–1.38)                                                                                                      | 0.93<br>(0.54–1.60)                                                                           | 1.23<br>(0.79–1.91)                                          | 0.48**<br>(0.29–0.78)                                           | 0.60<br>(0.31–1.15)                                     | 1.08<br>(0.59–1.97)                                               | 1.19<br>(0.72–1.97)                                                                                                        | 1.63*<br>(1.02–2.62)                                                                               |
| Covariates                                                    | ✓                                                          | ✓                                                             | ✓                                                     | ✓                                                               | ✓                                                                                                                        | ✓                                                                                             | ✓                                                            | ✓                                                               | ✓                                                       | ✓                                                                 | ✓                                                                                                                          | ✓                                                                                                  |
| Constant                                                      | 3.60*<br>(1.18–10.96)                                      | 0.02***<br>(0.01–0.07)                                        | 0.03***<br>(0.00–0.20)                                | 0.09***<br>(0.02–0.35)                                          | 0.07***<br>(0.02–0.26)                                                                                                   | 0.16**<br>(0.05–0.47)                                                                         | 4.49**<br>(1.68–12.03)                                       | 0.04***<br>(0.01–0.12)                                          | 0.25+<br>(0.06–1.08)                                    | 0.08***<br>(0.02–0.31)                                            | 0.05***<br>(0.02–0.15)                                                                                                     | 0.21**<br>(0.08–0.57)                                                                              |
| Observations                                                  | 1170                                                       | 1170                                                          | 1170                                                  | 1159                                                            | 1163                                                                                                                     | 1163                                                                                          | 1213                                                         | 1213                                                            | 1213                                                    | 1213                                                              | 1213                                                                                                                       | 1213                                                                                               |
| Pseudo R <sup>2</sup>                                         | 0.095                                                      | 0.179                                                         | 0.040                                                 | 0.034                                                           | 0.086                                                                                                                    | 0.033                                                                                         | 0.061                                                        | 0.268                                                           | 0.025                                                   | 0.015                                                             | 0.043                                                                                                                      | 0.041                                                                                              |

Odds ratios were reported; confidence intervals in parentheses; \*\*\* p<0.001, \*\* p<0.01, \* p<0.05, + p<0.10; Covariates include age, marital status, education, income, chronic conditions, number of impairments in activities of daily living, smoking behavior, and weight category.

**Table S9.** Determinants of frequency of physician visits (total sample and stratified by sex). Results of negative binomial regressions (main model extended by employment status).

|                                                            | (1)                                           | (2)                                   | (3)                                     |
|------------------------------------------------------------|-----------------------------------------------|---------------------------------------|-----------------------------------------|
|                                                            | Frequency of Physician Visits–Total<br>Sample | Frequency of Physician Visits–<br>Men | Frequency of Physician Visits–<br>Women |
| Materialistic mixed type (Reference category: Materialist) | 0.95<br>(0.80–1.13)                           | 1.16<br>(0.92–1.47)                   | 0.88<br>(0.71–1.09)                     |
| Post-materialistic mixed type                              | 0.89<br>(0.75–1.06)                           | 1.14<br>(0.90–1.45)                   | 0.80*<br>(0.65–0.99)                    |
| Post-materialist                                           | 0.84*<br>(0.71–1.00)                          | 1.11<br>(0.87–1.41)                   | 0.72**<br>(0.58–0.90)                   |
| Covariates                                                 | ✓                                             | ✓                                     | ✓                                       |
| Constant                                                   | 1.11<br>(0.86–1.44)                           | 0.67*<br>(0.48–0.93)                  | 1.70**<br>(1.18–2.45)                   |
| Observations                                               | 3337                                          | 1710                                  | 1627                                    |
| Pseudo R <sup>2</sup>                                      | 0.054                                         | 0.060                                 | 0.056                                   |

Incidence rate ratios were reported; confidence intervals in parentheses; \*\*\* p<0.001, \*\* p<0.01, \* p<0.05, + p<0.10; Covariates include age, marital status, education, employment status, chronic conditions, number of impairments in activities of daily living, smoking behavior, and weight category.

**Table S10.** Determinants of seeing the doctor (for several reasons). Results of logistic regressions (1 = yes, visiting the doctor for this reason; 0 = otherwise). (main model extended by employment status).

|                                                               | Reason for<br>Doctor<br>Visit:<br>Acute<br>Illness–<br>Men | Reason for<br>Doctor<br>Visit:<br>Chronic<br>Illness –<br>Men | Reason for<br>doctor<br>visit: Felt<br>unwell–<br>Men | Reason for<br>Doctor<br>Visit:<br>Requestin<br>g Advice–<br>Men | Reason for<br>doctor<br>visit: Visit<br>to the<br>doctor’s<br>office<br>(without<br>consulting<br>the<br>doctor)–<br>Men | Reason for<br>doctor<br>visit:<br>Preventive<br>medical<br>check-<br>up/vaccina<br>tion – Men | Reason for<br>Doctor<br>Visit:<br>Acute<br>Illness–<br>Women | Reason for<br>Doctor<br>Visit:<br>Chronic<br>Illness –<br>Women | Reason for<br>Doctor<br>visit: Felt<br>Unwell–<br>Women | Reason for<br>Doctor<br>Visit:<br>Requesting<br>Advice–<br>Women | Reason for<br>Doctor<br>Visit: Visit<br>to the<br>Doctor’s<br>Office<br>(Without<br>Consulting<br>the<br>Doctor)–<br>Women | Reason for<br>Doctor<br>Visit:<br>Preventive<br>Medical<br>Check-<br>up/Vaccina<br>tion –<br>Women |
|---------------------------------------------------------------|------------------------------------------------------------|---------------------------------------------------------------|-------------------------------------------------------|-----------------------------------------------------------------|--------------------------------------------------------------------------------------------------------------------------|-----------------------------------------------------------------------------------------------|--------------------------------------------------------------|-----------------------------------------------------------------|---------------------------------------------------------|------------------------------------------------------------------|----------------------------------------------------------------------------------------------------------------------------|----------------------------------------------------------------------------------------------------|
| Materialistic mixed type<br>(Reference category: Materialist) | 1.48<br>(0.84–2.62)                                        | 1.30<br>(0.74–2.28)                                           | 0.89<br>(0.36–2.20)                                   | 0.57+<br>(0.30–1.08)                                            | 0.74<br>(0.42–1.30)                                                                                                      | 0.95<br>(0.56–1.60)                                                                           | 1.13<br>(0.73–1.75)                                          | 0.60*<br>(0.37–0.95)                                            | 0.79<br>(0.43–1.45)                                     | 1.22<br>(0.68–2.18)                                              | 1.28<br>(0.79–2.08)                                                                                                        | 1.75*<br>(1.10–2.80)                                                                               |
| Post-materialistic mixed type                                 | 1.30<br>(0.74–2.29)                                        | 1.22<br>(0.69–2.14)                                           | 0.78<br>(0.31–1.92)                                   | 0.69<br>(0.37–1.29)                                             | 0.64<br>(0.36–1.12)                                                                                                      | 0.80<br>(0.47–1.35)                                                                           | 1.04<br>(0.67–1.60)                                          | 0.44***<br>(0.27–0.71)                                          | 0.74<br>(0.41–1.36)                                     | 0.97<br>(0.54–1.76)                                              | 1.40<br>(0.86–2.26)                                                                                                        | 2.21***<br>(1.40–3.49)                                                                             |
| Post-materialist                                              | 1.14<br>(0.64–2.03)                                        | 1.24<br>(0.69–2.23)                                           | 1.09<br>(0.44–2.72)                                   | 0.82<br>(0.43–1.55)                                             | 0.77<br>(0.43–1.40)                                                                                                      | 0.92<br>(0.54–1.58)                                                                           | 1.23<br>(0.79–1.92)                                          | 0.48**<br>(0.29–0.78)                                           | 0.58<br>(0.30–1.11)                                     | 1.12<br>(0.61–2.07)                                              | 1.23<br>(0.74–2.05)                                                                                                        | 1.61*<br>(1.00–2.59)                                                                               |
| Covariates                                                    | ✓                                                          | ✓                                                             | ✓                                                     | ✓                                                               | ✓                                                                                                                        | ✓                                                                                             | ✓                                                            | ✓                                                               | ✓                                                       | ✓                                                                | ✓                                                                                                                          | ✓                                                                                                  |
| Constant                                                      | 2.59*<br>(1.18–5.67)                                       | 0.03***<br>(0.01–0.08)                                        | 0.03***<br>(0.01–0.14)                                | 0.17***<br>(0.06–0.46)                                          | 0.05***<br>(0.02–0.14)                                                                                                   | 0.21***<br>(0.09–0.46)                                                                        | 1.95+<br>(0.96–3.96)                                         | 0.05***<br>(0.02–0.12)                                          | 0.21**<br>(0.07–0.61)                                   | 0.08***<br>(0.03–0.23)                                           | 0.08***<br>(0.03–0.18)                                                                                                     | 0.21***<br>(0.10–0.44)                                                                             |
| Observations                                                  | 1169                                                       | 1169                                                          | 1169                                                  | 1158                                                            | 1162                                                                                                                     | 1162                                                                                          | 1214                                                         | 1214                                                            | 1214                                                    | 1214                                                             | 1214                                                                                                                       | 1214                                                                                               |
| Pseudo R <sup>2</sup>                                         | 0.095                                                      | 0.181                                                         | 0.048                                                 | 0.035                                                           | 0.086                                                                                                                    | 0.033                                                                                         | 0.058                                                        | 0.267                                                           | 0.028                                                   | 0.023                                                            | 0.047                                                                                                                      | 0.043                                                                                              |

Odds ratios were reported; confidence intervals in parentheses; \*\*\* p<0.001, \*\* p<0.01, \* p<0.05, + p<0.10; Covariates include age, marital status, education, employment status, chronic conditions, number of impairments in activities of daily living, smoking behavior, and weight category.

**Table S11.** Determinants of frequency of physician visits (total sample and stratified by sex). Results of negative binomial regressions (main model extended by monthly dummies).

|                                                            | (1)                                          | (2)                                 | (3)                                   |
|------------------------------------------------------------|----------------------------------------------|-------------------------------------|---------------------------------------|
|                                                            | Frequency of physician visits – Total sample | Frequency of physician visits – Men | Frequency of physician visits – Women |
| Materialistic mixed type (Reference category: Materialist) | 0.96<br>(0.81–1.14)                          | 1.20<br>(0.95–1.52)                 | 0.88<br>(0.71–1.09)                   |
| Post-materialistic mixed type                              | 0.89<br>(0.75–1.05)                          | 1.15<br>(0.91–1.45)                 | 0.81*<br>(0.66–1.00)                  |
| Post-materialist                                           | 0.84*<br>(0.70–0.99)                         | 1.11<br>(0.88–1.40)                 | 0.73**<br>(0.58–0.90)                 |
| Covariates                                                 | ✓                                            | ✓                                   | ✓                                     |
| Constant                                                   | 1.03<br>(0.76–1.40)                          | 0.67+<br>(0.43–1.05)                | 1.42+<br>(0.95–2.14)                  |
| Observations                                               | 3338                                         | 1711                                | 1627                                  |
| Pseudo R <sup>2</sup>                                      | 0.054                                        | 0.060                               | 0.056                                 |

Incidence rate ratios were reported; confidence intervals in parentheses; \*\*\* p<0.001, \*\* p<0.01, \* p<0.05, + p<0.10; Covariates include age, monthly dummies, marital status, education, chronic conditions, number of impairments in activities of daily living, smoking behavior, and weight category.

**Table S12.** Determinants of seeing the doctor (for several reasons). Results of logistic regressions (1 = yes, visiting the doctor for this reason; 0 = otherwise). (main model extended by monthly dummies).

|                                                               | Reason for<br>Doctor<br>Visit:<br>Acute<br>Illness–<br>Men | Reason for<br>Doctor<br>Visit:<br>Chronic<br>Illness –<br>Men | Reason for<br>Doctor<br>Visit: Felt<br>Unwell–<br>Men | Reason for<br>Doctor<br>Visit:<br>Requestin<br>g Advice–<br>Men | Reason for<br>Doctor<br>Visit: Visit<br>to the<br>Doctor’s<br>Office<br>(Without<br>Consulting<br>the<br>Doctor)–<br>Men | Reason for<br>Doctor<br>Visit:<br>Preventive<br>Medical<br>Check-<br>up/Vaccina<br>tion – Men | Reason for<br>Doctor<br>Visit:<br>Acute<br>Illness–<br>Women | Reason for<br>Doctor<br>Visit:<br>Chronic<br>Illness –<br>Women | Reason for<br>Doctor<br>Visit: Felt<br>Unwell–<br>Women | Reason for<br>Doctor<br>Visit:<br>Requestin<br>g Advice–<br>Women | Reason for<br>Doctor<br>Visit: Visit<br>to the<br>Doctor’s<br>Office<br>(Without<br>Consulting<br>the<br>Doctor)–<br>Women | Reason for<br>Doctor<br>Visit:<br>Preventive<br>Medical<br>Check-<br>up/Vaccina<br>tion –<br>Women |
|---------------------------------------------------------------|------------------------------------------------------------|---------------------------------------------------------------|-------------------------------------------------------|-----------------------------------------------------------------|--------------------------------------------------------------------------------------------------------------------------|-----------------------------------------------------------------------------------------------|--------------------------------------------------------------|-----------------------------------------------------------------|---------------------------------------------------------|-------------------------------------------------------------------|----------------------------------------------------------------------------------------------------------------------------|----------------------------------------------------------------------------------------------------|
| Materialistic mixed type<br>(Reference category: Materialist) | 1.48<br>(0.84–2.61)                                        | 1.24<br>(0.71–2.18)                                           | 0.82<br>(0.33–2.04)                                   | 0.57+<br>(0.30–1.09)                                            | 0.76<br>(0.43–1.34)                                                                                                      | 0.98<br>(0.58–1.67)                                                                           | 1.15<br>(0.74–1.78)                                          | 0.61*<br>(0.38–0.97)                                            | 0.80<br>(0.44–1.47)                                     | 1.16<br>(0.65–2.07)                                               | 1.21<br>(0.74–1.97)                                                                                                        | 1.80*<br>(1.13–2.87)                                                                               |
| Post-materialistic mixed type                                 | 1.27<br>(0.72–2.24)                                        | 1.19<br>(0.68–2.09)                                           | 0.78<br>(0.31–1.92)                                   | 0.69<br>(0.37–1.29)                                             | 0.66<br>(0.37–1.17)                                                                                                      | 0.81<br>(0.48–1.37)                                                                           | 1.04<br>(0.67–1.60)                                          | 0.45***<br>(0.28–0.72)                                          | 0.75<br>(0.41–1.37)                                     | 0.91<br>(0.50–1.64)                                               | 1.36<br>(0.84–2.19)                                                                                                        | 2.31***<br>(1.46–3.65)                                                                             |
| Post-materialist                                              | 1.13<br>(0.63–2.02)                                        | 1.18<br>(0.65–2.12)                                           | 1.09<br>(0.43–2.71)                                   | 0.81<br>(0.42–1.54)                                             | 0.78<br>(0.43–1.42)                                                                                                      | 0.93<br>(0.54–1.60)                                                                           | 1.25<br>(0.80–1.95)                                          | 0.49**<br>(0.30–0.81)                                           | 0.57+<br>(0.30–1.11)                                    | 1.08<br>(0.58–1.98)                                               | 1.12<br>(0.67–1.86)                                                                                                        | 1.65*<br>(1.02–2.65)                                                                               |
| Covariates                                                    | ✓                                                          | ✓                                                             | ✓                                                     | ✓                                                               | ✓                                                                                                                        | ✓                                                                                             | ✓                                                            | ✓                                                               | ✓                                                       | ✓                                                                 | ✓                                                                                                                          | ✓                                                                                                  |
| Constant                                                      | 3.71*<br>(1.34–10.27)                                      | 0.02***<br>(0.01–0.08)                                        | 0.07**<br>(0.01–0.38)                                 | 0.16**<br>(0.04–0.59)                                           | 0.02***<br>(0.00–0.07)                                                                                                   | 0.10***<br>(0.03–0.29)                                                                        | 2.18+<br>(0.90–5.27)                                         | 0.03***<br>(0.01–0.08)                                          | 0.32+<br>(0.09–1.11)                                    | 0.10***<br>(0.03–0.36)                                            | 0.10***<br>(0.03–0.27)                                                                                                     | 0.09***<br>(0.03–0.25)                                                                             |
| Observations                                                  | 1170                                                       | 1165                                                          | 1170                                                  | 1154                                                            | 1163                                                                                                                     | 1163                                                                                          | 1206                                                         | 1214                                                            | 1214                                                    | 1214                                                              | 1214                                                                                                                       | 1214                                                                                               |
| Pseudo R <sup>2</sup>                                         | 0.099                                                      | 0.187                                                         | 0.050                                                 | 0.040                                                           | 0.100                                                                                                                    | 0.037                                                                                         | 0.059                                                        | 0.273                                                           | 0.031                                                   | 0.022                                                             | 0.050                                                                                                                      | 0.050                                                                                              |

Odds ratios were reported; confidence intervals in parentheses; \*\*\* p<0.001, \*\* p<0.01, \* p<0.05, + p<0.10; Covariates include age, monthly dummies, marital status, education, chronic conditions, number of impairments in activities of daily living, smoking behavior, and weight category.

**Table S13.** Determinants of frequency of physician visits (total sample and stratified by sex). Results of negative binomial regressions (main model extended by town size).

|                                                            | (1)                                             | (2)                                    | (3)                                      |
|------------------------------------------------------------|-------------------------------------------------|----------------------------------------|------------------------------------------|
|                                                            | Frequency of Physician Visits – Total<br>Sample | Frequency of Physician Visits –<br>Men | Frequency of Physician Visits –<br>Women |
| Materialistic mixed type (Reference category: Materialist) | 0.96<br>(0.81–1.13)                             | 1.20<br>(0.95–1.50)                    | 0.86<br>(0.70–1.07)                      |
| Post-materialistic mixed type                              | 0.90<br>(0.77–1.07)                             | 1.16<br>(0.92–1.46)                    | 0.81*<br>(0.65–0.99)                     |
| Post-materialist                                           | 0.83*<br>(0.70–0.98)                            | 1.09<br>(0.87–1.37)                    | 0.72**<br>(0.58–0.90)                    |
| Covariates                                                 | ✓                                               | ✓                                      | ✓                                        |
| Constant                                                   | 1.06<br>(0.76–1.49)                             | 0.63*<br>(0.40–0.97)                   | 1.63*<br>(1.10–2.44)                     |
| Observations                                               | 3338                                            | 1711                                   | 1627                                     |
| Pseudo R <sup>2</sup>                                      | 0.056                                           | 0.060                                  | 0.061                                    |

Incidence rate ratios were reported; confidence intervals in parentheses; \*\*\* p<0.001, \*\* p<0.01, \* p<0.05, + p<0.10; Covariates include age, town size, marital status, education, chronic conditions, number of impairments in activities of daily living, smoking behavior, and weight category.



**Table S14.** Determinants of seeing the doctor (for several reasons). Results of logistic regressions (1 = yes, visiting the doctor for this reason; 0 = otherwise) (main model extended by town size).

|                                                               | Reason for<br>Doctor<br>Visit:<br>Acute<br>Illness–<br>Men | Reason for<br>Doctor<br>Visit:<br>Chronic<br>Illness –<br>Men | Reason<br>for<br>Doctor<br>Visit: Felt<br>Unwell–<br>Men | Reason for<br>Doctor<br>Visit:<br>Requesting<br>Advice–<br>Men | Reason for<br>Doctor<br>Visit: Visit<br>to the<br>Doctor’s<br>Office<br>(Without<br>Consulting<br>the<br>Doctor)–<br>Men | Reason for<br>Doctor<br>Visit:<br>Preventive<br>Medical<br>Check-<br>up/Vaccina<br>tion – Men | Reason for<br>Doctor<br>Visit:<br>Acute<br>Illness–<br>Women | Reason for<br>Doctor<br>Visit:<br>Chronic<br>Illness –<br>Women | Reason for<br>Doctor<br>Visit: Felt<br>Unwell–<br>Women | Reason for<br>Doctor<br>Visit:<br>Requesting<br>Advice–<br>Women | Reason for<br>Doctor<br>Visit: Visit<br>to the<br>Doctor’s<br>Office<br>(Without<br>Consulting<br>the<br>Doctor)–<br>Women | Reason for<br>Doctor<br>Visit:<br>Preventive<br>Medical<br>Check-<br>up/Vaccina<br>tion –<br>Women |
|---------------------------------------------------------------|------------------------------------------------------------|---------------------------------------------------------------|----------------------------------------------------------|----------------------------------------------------------------|--------------------------------------------------------------------------------------------------------------------------|-----------------------------------------------------------------------------------------------|--------------------------------------------------------------|-----------------------------------------------------------------|---------------------------------------------------------|------------------------------------------------------------------|----------------------------------------------------------------------------------------------------------------------------|----------------------------------------------------------------------------------------------------|
| Materialistic mixed type<br>(Reference category: Materialist) | 1.43<br>(0.81–2.53)                                        | 1.30<br>(0.74–2.29)                                           | 0.86<br>(0.35–2.12)                                      | 0.59<br>(0.31–1.12)                                            | 0.73<br>(0.41–1.28)                                                                                                      | 0.95<br>(0.56–1.61)                                                                           | 1.13<br>(0.73–1.76)                                          | 0.60*<br>(0.37–0.96)                                            | 0.83<br>(0.45–1.51)                                     | 1.19<br>(0.66–2.12)                                              | 1.23<br>(0.76–2.01)                                                                                                        | 1.81*<br>(1.13–2.88)                                                                               |
| Post-materialistic mixed type                                 | 1.28<br>(0.72–2.25)                                        | 1.21<br>(0.69–2.14)                                           | 0.79<br>(0.32–1.94)                                      | 0.68<br>(0.36–1.28)                                            | 0.63<br>(0.36–1.11)                                                                                                      | 0.79<br>(0.46–1.33)                                                                           | 1.04<br>(0.67–1.60)                                          | 0.45***<br>(0.28–0.72)                                          | 0.76<br>(0.42–1.39)                                     | 0.93<br>(0.51–1.69)                                              | 1.33<br>(0.82–2.16)                                                                                                        | 2.29***<br>(1.45–3.62)                                                                             |
| Post-materialist                                              | 1.13<br>(0.63–2.02)                                        | 1.21<br>(0.67–2.18)                                           | 1.07<br>(0.43–2.67)                                      | 0.80<br>(0.42–1.52)                                            | 0.76<br>(0.42–1.38)                                                                                                      | 0.93<br>(0.54–1.60)                                                                           | 1.24<br>(0.79–1.94)                                          | 0.48**<br>(0.29–0.79)                                           | 0.61<br>(0.31–1.18)                                     | 1.08<br>(0.59–1.99)                                              | 1.19<br>(0.71–1.97)                                                                                                        | 1.62*<br>(1.01–2.61)                                                                               |
| Covariates                                                    | ✓                                                          | ✓                                                             | ✓                                                        | ✓                                                              | ✓                                                                                                                        | ✓                                                                                             | ✓                                                            | ✓                                                               | ✓                                                       | ✓                                                                | ✓                                                                                                                          | ✓                                                                                                  |
| Constant                                                      | 2.20+<br>(0.88–5.51)                                       | 0.03***<br>(0.01–0.08)                                        | 0.03***<br>(0.01–0.16)                                   | 0.16**<br>(0.05–0.51)                                          | 0.07***<br>(0.02–0.20)                                                                                                   | 0.22**<br>(0.09–0.54)                                                                         | 1.44<br>(0.62–3.33)                                          | 0.05***<br>(0.02–0.13)                                          | 0.13**<br>(0.03–0.48)                                   | 0.08***<br>(0.03–0.28)                                           | 0.09***<br>(0.04–0.25)                                                                                                     | 0.24**<br>(0.10–0.56)                                                                              |
| Observations                                                  | 1170                                                       | 1170                                                          | 1170                                                     | 1159                                                           | 1163                                                                                                                     | 1163                                                                                          | 1214                                                         | 1214                                                            | 1214                                                    | 1214                                                             | 1214                                                                                                                       | 1214                                                                                               |
| Pseudo R <sup>2</sup>                                         | 0.0985                                                     | 0.183                                                         | 0.0494                                                   | 0.0476                                                         | 0.0959                                                                                                                   | 0.0403                                                                                        | 0.0612                                                       | 0.276                                                           | 0.0341                                                  | 0.0235                                                           | 0.0548                                                                                                                     | 0.0475                                                                                             |

Odds ratios were reported; confidence intervals in parentheses; \*\*\* p<0.001, \*\* p<0.01, \* p<0.05, + p<0.10; Covariates include age, town size, marital status, education, chronic conditions, number of impairments in activities of daily living, smoking behavior, and weight category.

**Table S15.** Determinants of frequency of physician visits (total sample and stratified by sex). Results of negative binomial regressions (main model extended by town size).

|                                                            | (1)                                                                          | (2)                                                              | (3)                                                                | (4)                                                                  | (5)                                                         | (6)                                                           |
|------------------------------------------------------------|------------------------------------------------------------------------------|------------------------------------------------------------------|--------------------------------------------------------------------|----------------------------------------------------------------------|-------------------------------------------------------------|---------------------------------------------------------------|
|                                                            | Frequency of<br>Physician Visits –<br>Total Sample<br>Aged 18 to 49<br>Years | Frequency of<br>Physician Visits –<br>Men Aged 18 to<br>49 Years | Frequency of<br>Physician Visits –<br>Women Aged 18<br>to 49 Years | Frequency of<br>Physician Visits –<br>Total Sample<br>Aged 50+ Years | Frequency of<br>Physician Visits –<br>Men Aged 50+<br>Years | Frequency of<br>Physician Visits –<br>Women Aged 50+<br>Years |
| Materialistic mixed type (Reference category: Materialist) | 0.90<br>(0.69–1.17)                                                          | 1.59*<br>(1.11–2.27)                                             | 0.71*<br>(0.51–0.98)                                               | 0.98<br>(0.79–1.21)                                                  | 0.99<br>(0.73–1.34)                                         | 1.00<br>(0.75–1.32)                                           |
| Post-materialistic mixed type                              | 0.87<br>(0.67–1.13)                                                          | 1.43*<br>(1.01–2.02)                                             | 0.73*<br>(0.54–1.00)                                               | 0.90<br>(0.72–1.12)                                                  | 1.01<br>(0.74–1.39)                                         | 0.82<br>(0.62–1.09)                                           |
| Post-materialist                                           | 0.82<br>(0.63–1.06)                                                          | 1.35+<br>(0.95–1.92)                                             | 0.64**<br>(0.47–0.87)                                              | 0.83<br>(0.67–1.04)                                                  | 0.98<br>(0.72–1.34)                                         | 0.72*<br>(0.54–0.97)                                          |
| Covariates                                                 | ✓                                                                            | ✓                                                                | ✓                                                                  | ✓                                                                    | ✓                                                           | ✓                                                             |
| Constant                                                   | 1.08<br>(0.74–1.59)                                                          | 0.50*<br>(0.28–0.89)                                             | 1.96**<br>(1.21–3.19)                                              | 1.17<br>(0.66–2.09)                                                  | 0.72<br>(0.36–1.42)                                         | 2.02<br>(0.86–4.77)                                           |
| Observations                                               | 1640                                                                         | 827                                                              | 813                                                                | 1698                                                                 | 884                                                         | 814                                                           |
| Pseudo R <sup>2</sup>                                      | 0.054                                                                        | 0.043                                                            | 0.072                                                              | 0.050                                                                | 0.058                                                       | 0.051                                                         |

Incidence rate ratios were reported; confidence intervals in parentheses; \*\*\* p<0.001, \*\* p<0.01, \* p<0.05, + p<0.10; Covariates include age, marital status, education, chronic conditions, number of impairments in activities of daily living, smoking behavior, and weight category.
